# Supplementary material for: Upregulation of cell surface GD3 ganglioside phenotype is associated with human melanoma brain metastasis
Source: PubMed Central journal article supplement (PMC7400791; doi:10.1002/1878-0261.12702), 2020-06-05

Supplementary Figure S2

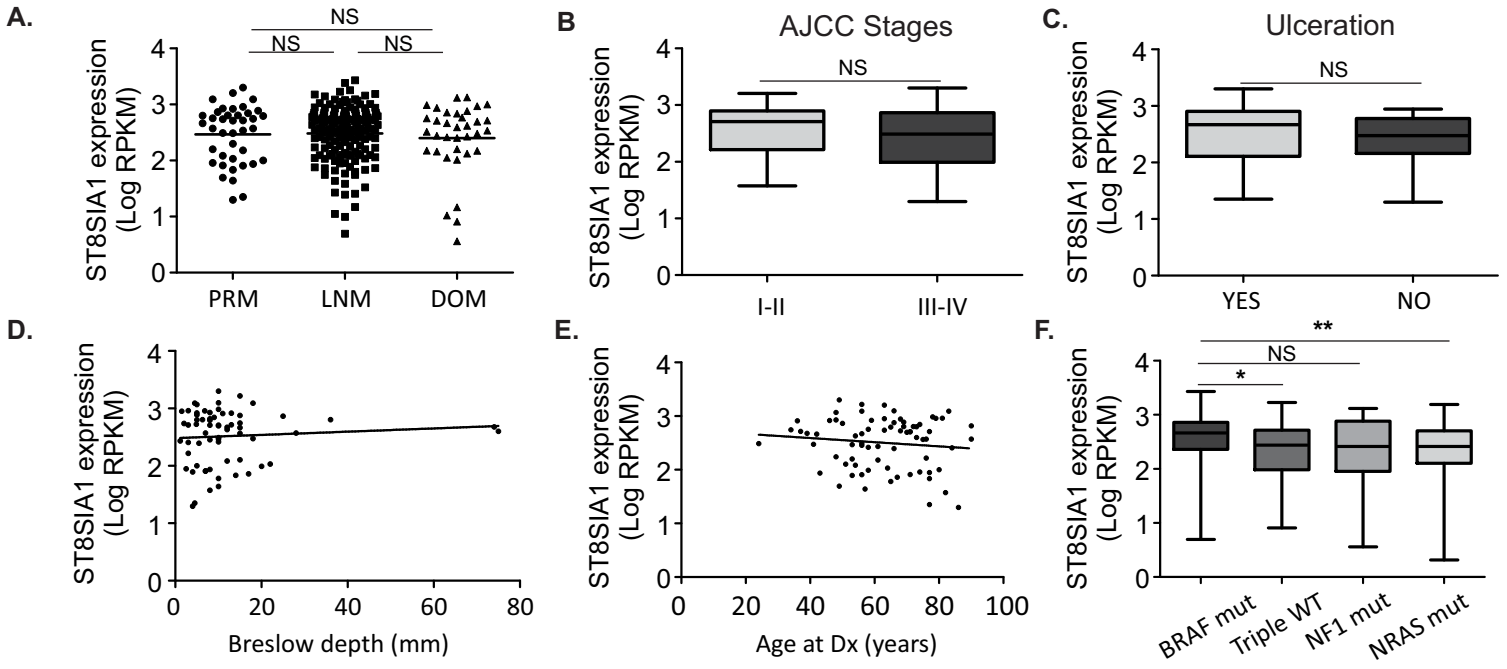

Supplement: MOL2-14-1760-s002.pdf [file MOL2-14-1760-s002.pdf]
